# Supplementary material for: Epigenetic and Genetic Contribution for Expression Bias of Homologous Alleles in Polyploid Sugarcane
Source: MDPI journal article supplement (doi:10.3390/agronomy12112852), 2022-11-15
Supplement: s1 [file s1]

**Table S2.** Summary of nine expression categories of homologous tetrad alleles in four tissues.

| Sample     | Classification | Number   | Total number | Ratio |      |      |
|------------|----------------|----------|--------------|-------|------|------|
| Leaf       | Balanced       | 512      | 3312         | 0.15  |      |      |
|            | Dominant       | A        | 185          | 3312  | 0.06 |      |
|            |                | B        | 155          | 3312  | 0.05 |      |
|            |                | C        | 200          | 3312  | 0.06 |      |
|            |                | D        | 173          | 3312  | 0.05 |      |
|            | Suppressed     | A        | 488          | 3312  | 0.15 |      |
|            |                | B        | 524          | 3312  | 0.16 |      |
|            |                | C        | 517          | 3312  | 0.16 |      |
|            |                | D        | 558          | 3312  | 0.17 |      |
|            | Balanced       | 598      | 3508         | 0.17  |      |      |
|            | Root           | Dominant | A            | 165   | 3508 | 0.05 |
|            |                |          | B            | 181   | 3508 | 0.05 |
| C          |                |          | 206          | 3508  | 0.06 |      |
| D          |                |          | 168          | 3508  | 0.05 |      |
| Suppressed |                | A        | 513          | 3508  | 0.15 |      |
|            |                | B        | 541          | 3508  | 0.15 |      |
|            |                | C        | 563          | 3508  | 0.16 |      |
|            |                | D        | 573          | 3508  | 0.16 |      |
| Balanced   |                | 534      | 3329         | 0.16  |      |      |
| Rind       |                | Dominant | A            | 199   | 3329 | 0.06 |
|            |                |          | B            | 165   | 3329 | 0.05 |
|            |                |          | C            | 206   | 3329 | 0.06 |
|            | D              |          | 179          | 3329  | 0.05 |      |
|            | Suppressed     | A        | 475          | 3329  | 0.14 |      |
|            |                | B        | 525          | 3329  | 0.16 |      |
|            |                | C        | 516          | 3329  | 0.16 |      |
|            |                | D        | 530          | 3329  | 0.16 |      |
|            | Balanced       | 447      | 3166         | 0.14  |      |      |
|            | Pith           | Dominant | A            | 196   | 3166 | 0.06 |
|            |                |          | B            | 165   | 3166 | 0.05 |
|            |                |          | C            | 208   | 3166 | 0.07 |
| D          |                |          | 162          | 3166  | 0.05 |      |
| Suppressed |                | A        | 459          | 3166  | 0.14 |      |
|            |                | B        | 495          | 3166  | 0.16 |      |
|            |                | C        | 492          | 3166  | 0.16 |      |
|            |                | D        | 542          | 3166  | 0.17 |      |
